# Supplementary material for: Spotlight on a Short-Time Treatment with the IL-4/IL-13 Receptor Blocker in Patients with CRSwNP: microRNAs Modulations and Preliminary Clinical Evidence
Source: MDPI journal article supplement (doi:10.3390/genes13122366), 2022-12-15
Supplement: s1 [file s1]

**Supplementary Figure S1:** More representative pathway in which the identified miRNAs are involved, according to the mirpath3 database.

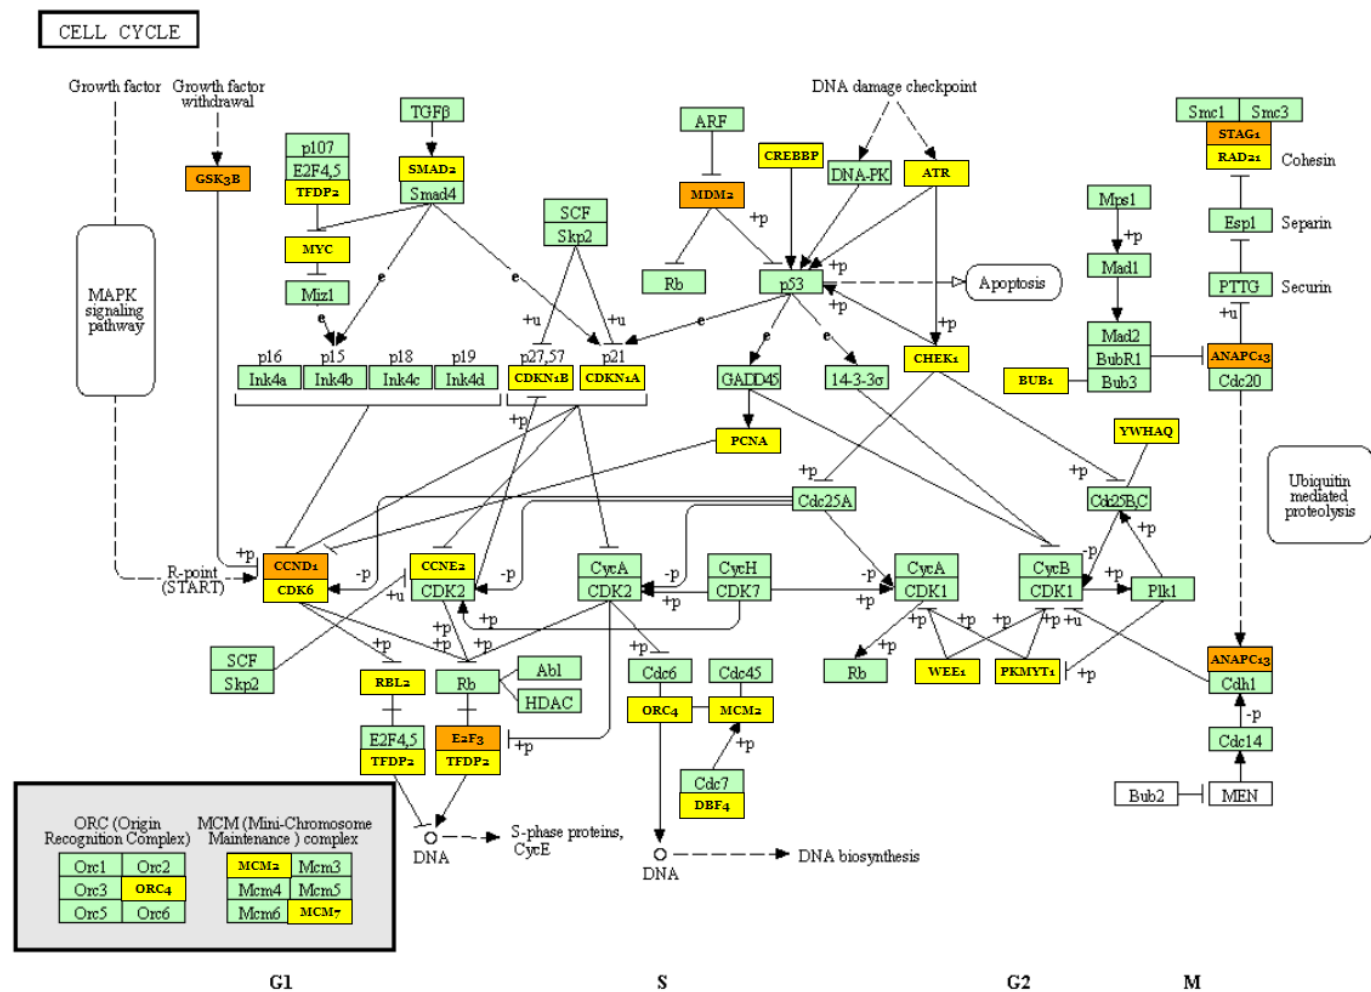

## DNA REPLICATION

### Replication complex (Bacteria)

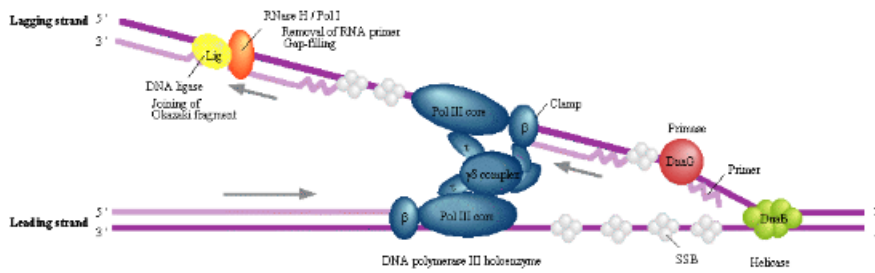

#### DNA polymerase III holoenzyme

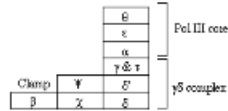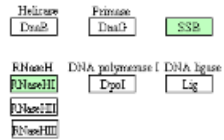

### Replication complex (Archaea)

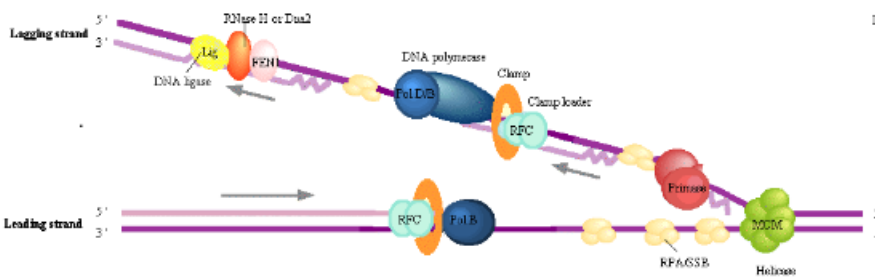

#### DNA polymerase B DNA polymerase D

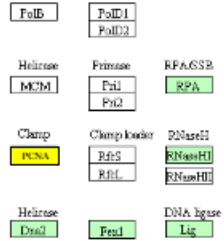

### Replication complex (Eukaryotes)

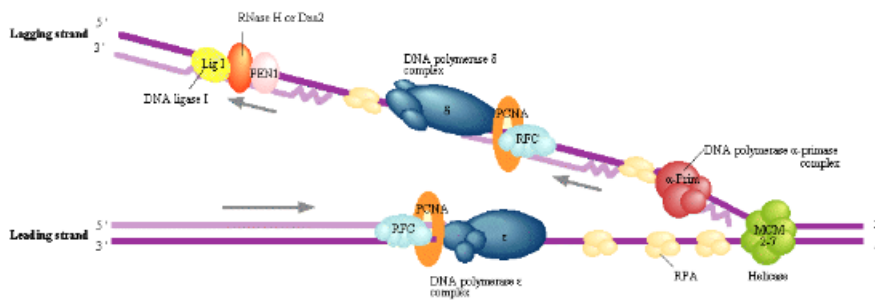

#### DNA polymerase $\alpha$ -prime complex

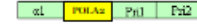

#### DNA polymerase $\delta$ complex

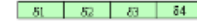

#### DNA polymerase $\epsilon$ complex

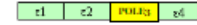

#### MCM complex (helicase)

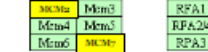

#### Clamp

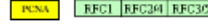

#### Clamp loader

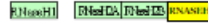

#### RNaseHII

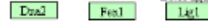

#### Helicase

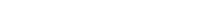

## ESTROGEN SIGNALING PATHWAY

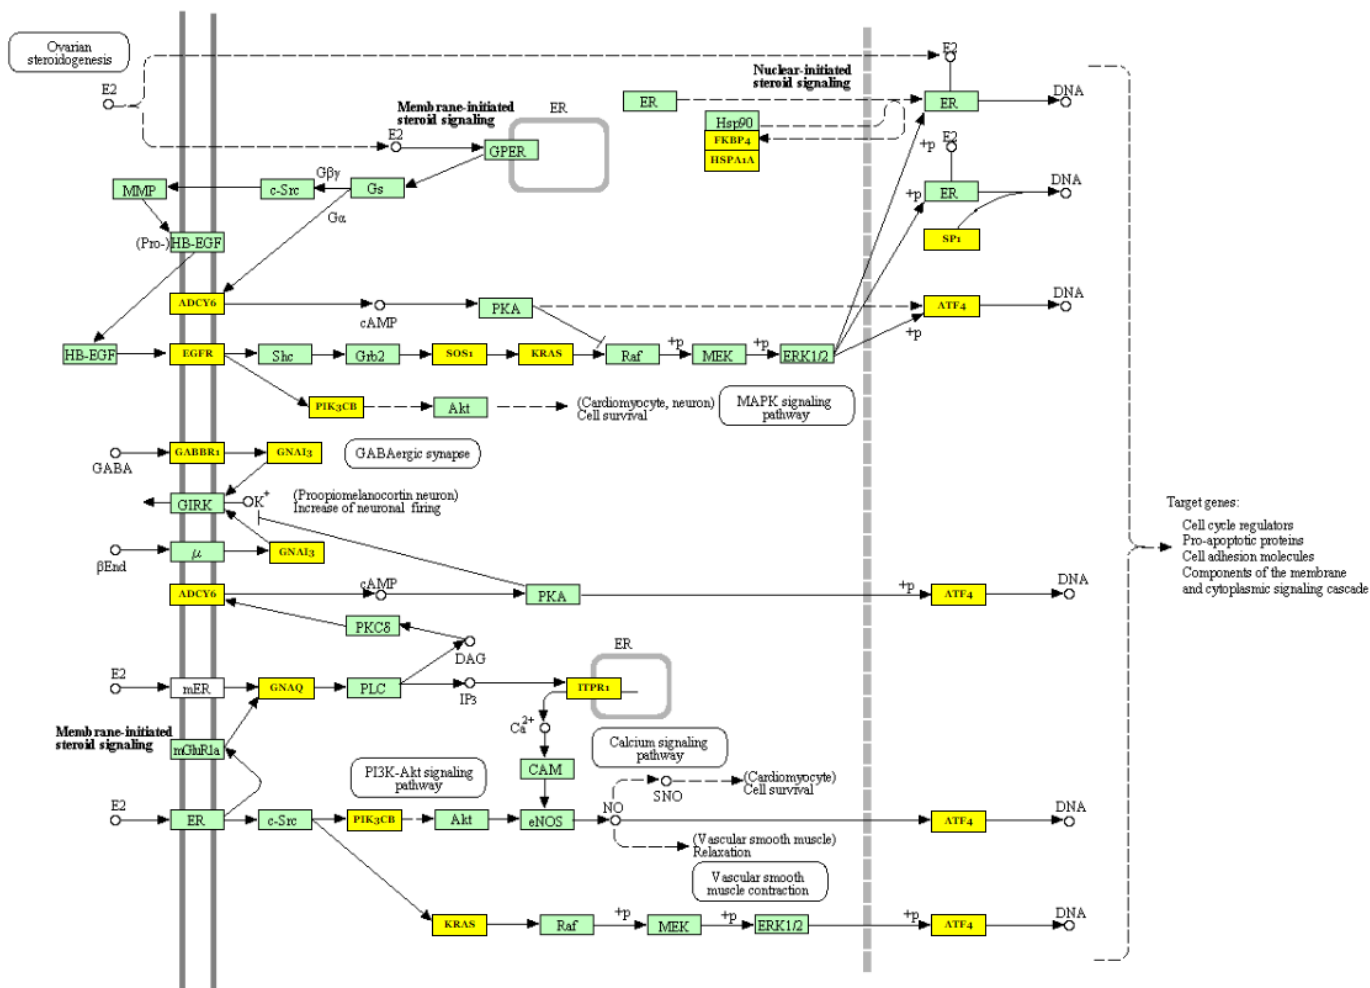

04915 2/6/15  
(c) Kanehisa Laboratories

## FOXO SIGNALING PATHWAY

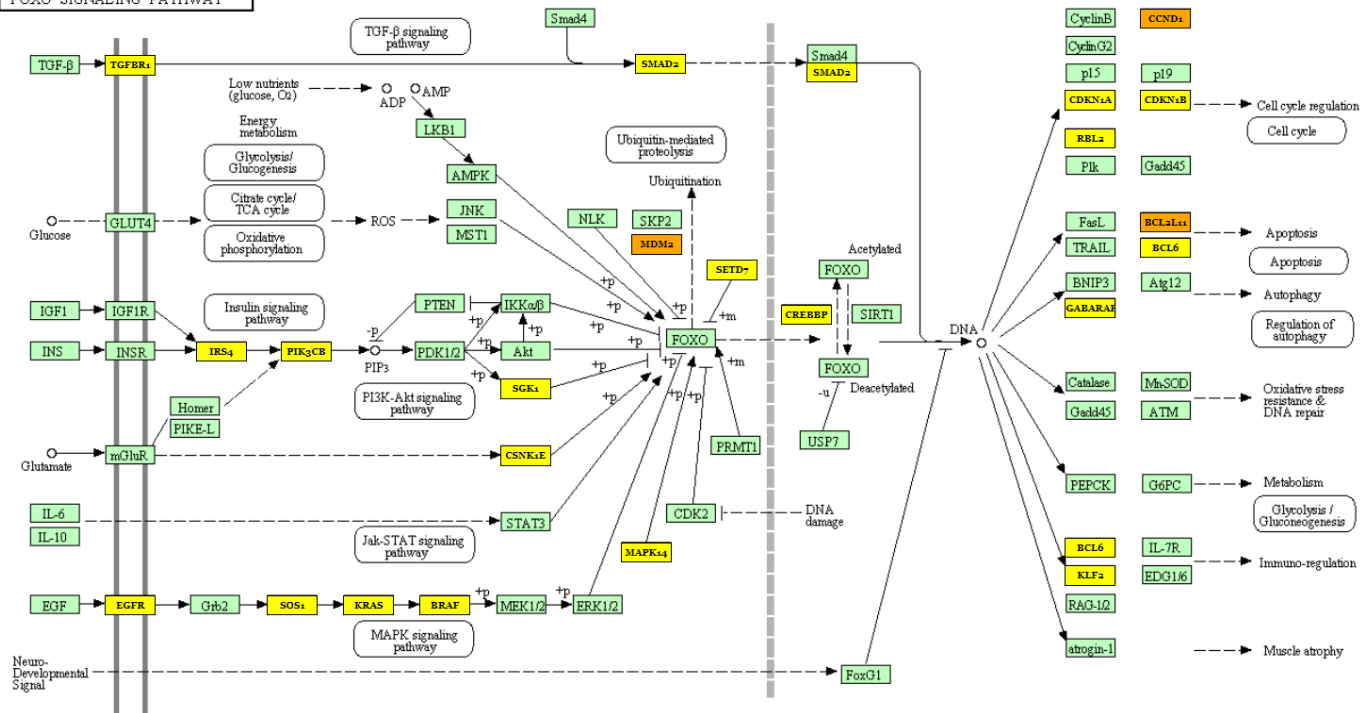

04068 5/8/14  
(c) Kanehisa Laboratories

: gene contained in 1 list  
 : gene contained in > 1 lists

### MAPK SIGNALING PATHWAY

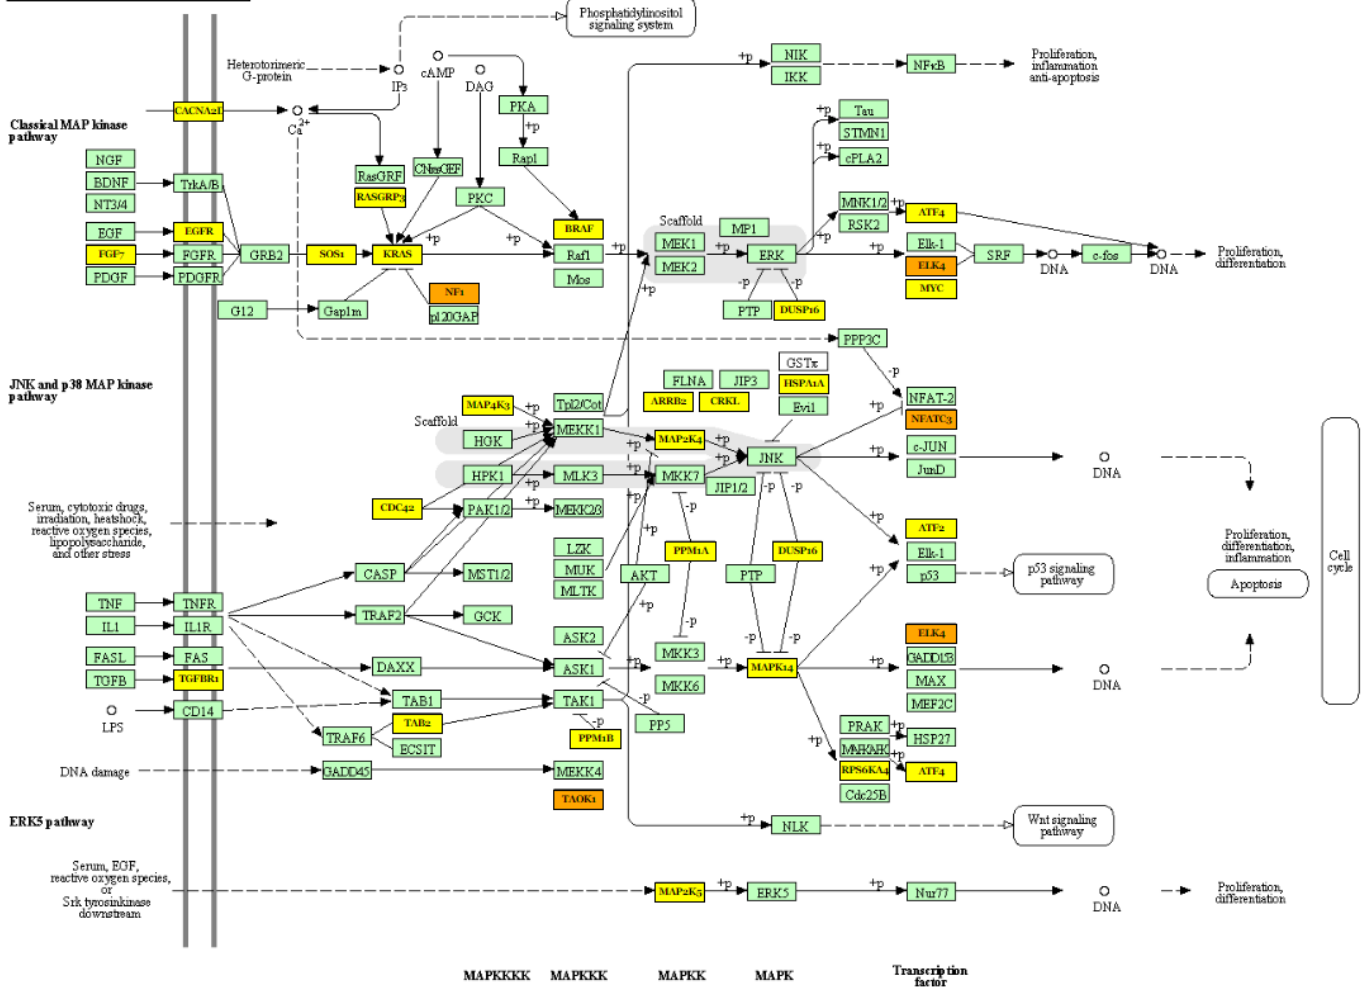

## P53 SIGNALING PATHWAY

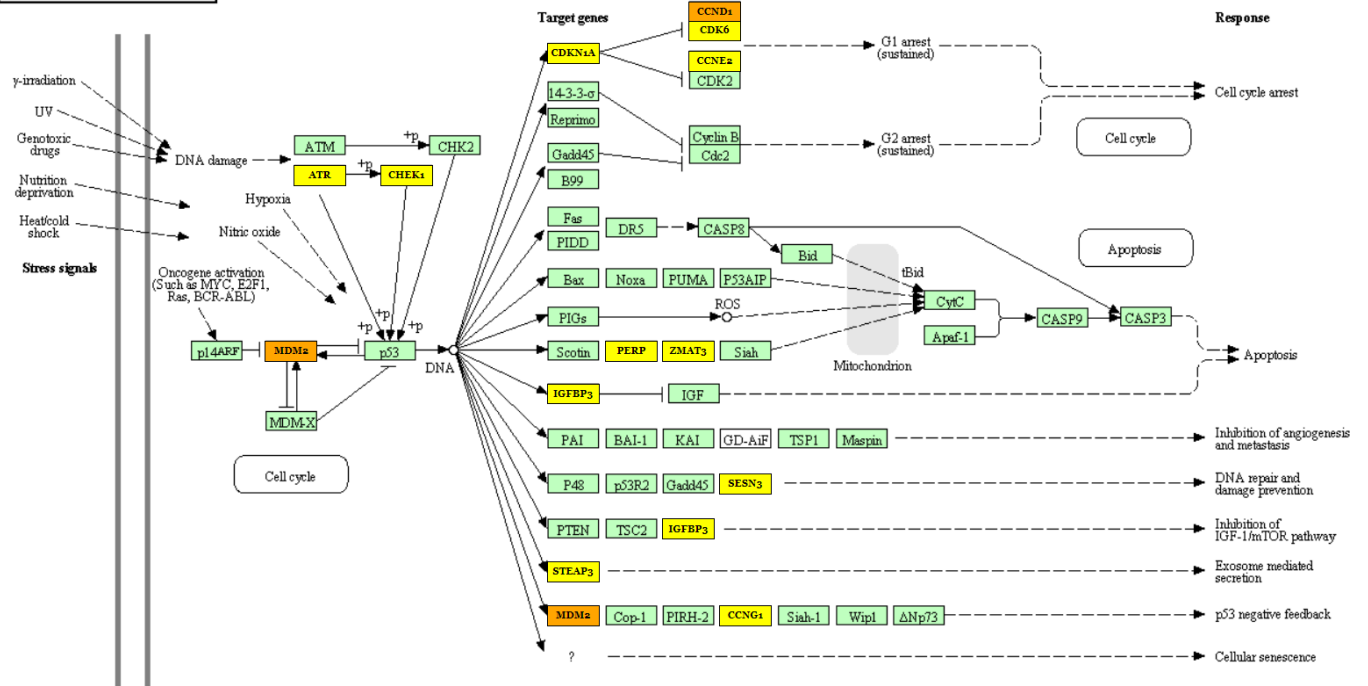

04115 3/7/13  
(c) Kanehisa Laboratories

## PLATELET ACTIVATION

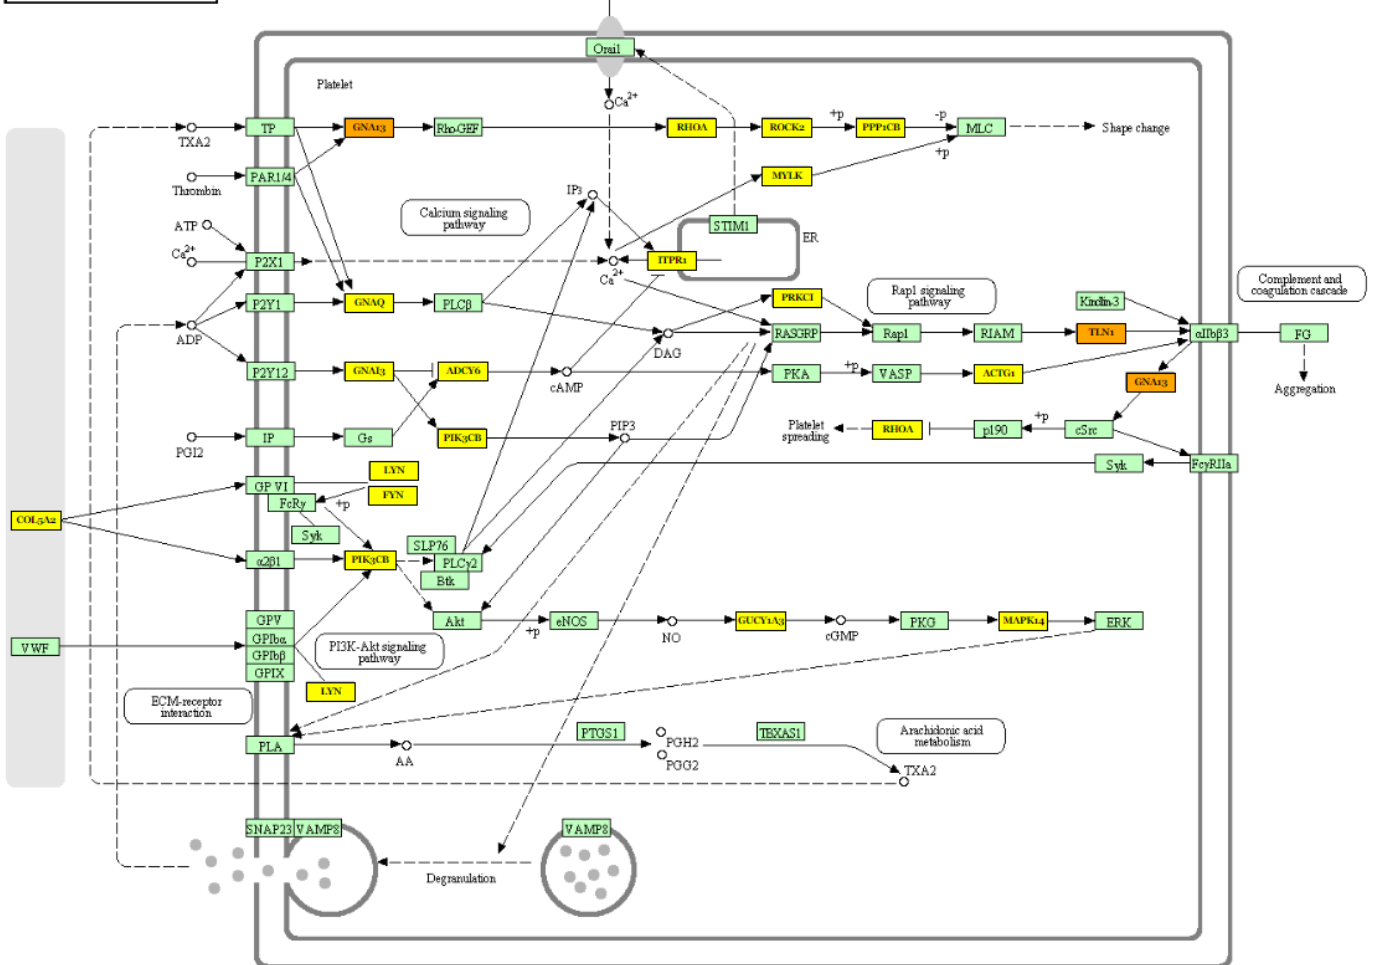

04611 2/13/15  
(c) Kanehisa Laboratories

# TGF-BETA SIGNALING PATHWAY

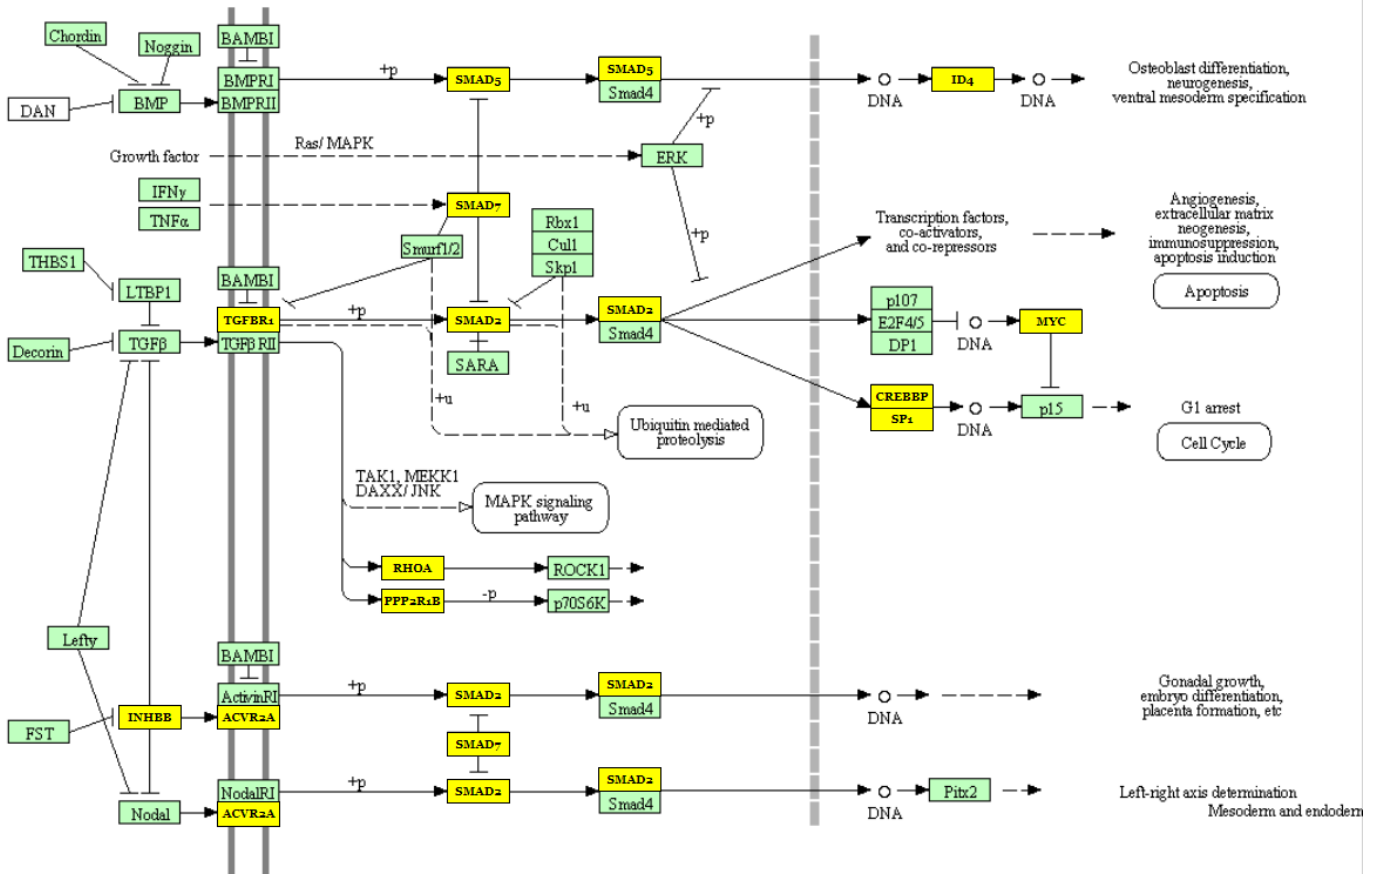

04350 10/29/13  
(c) Kanehisa Laboratories

## VIRAL CARCINOGENESIS

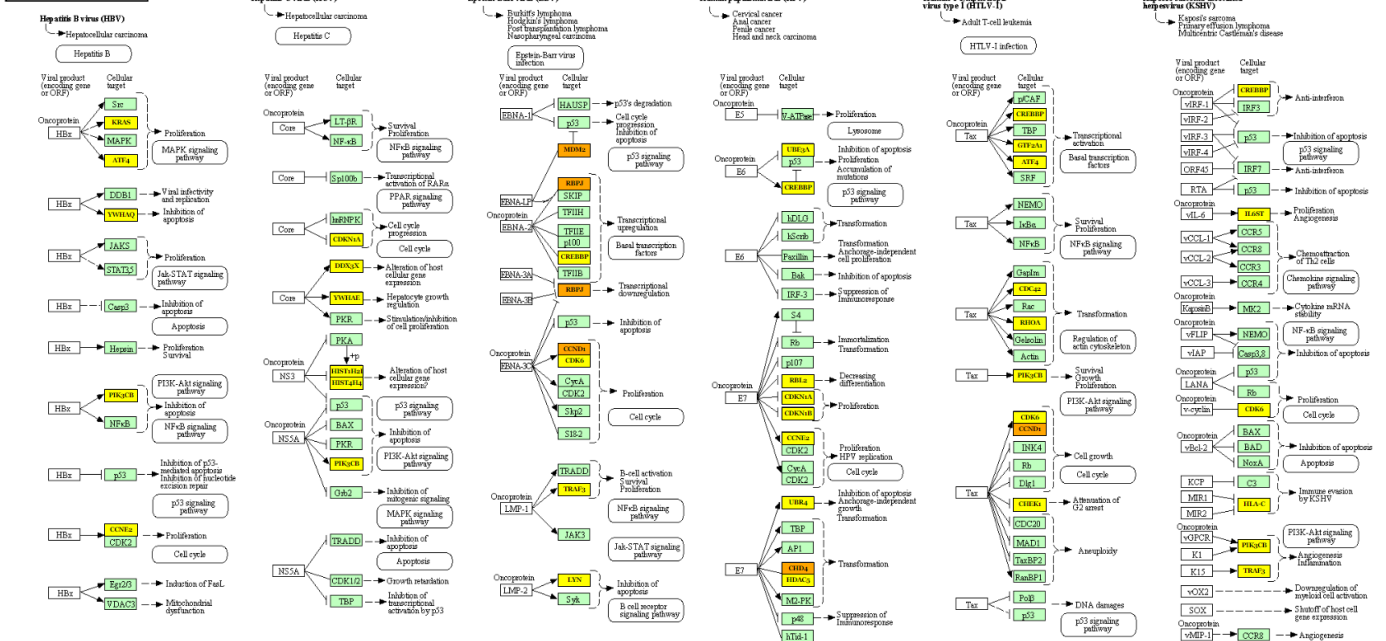

05033 1/16/15  
(c) Kanehisa Laboratories
